# Supplementary material
Source: PubMed Central journal article supplement (PMC3416137)
Supplement: JVI.00158-12_zjv999096460so1.pdf [file JVI.00158-12_zjv999096460so1.pdf]

**Table S1: shRNA clones and their target sequences**

| <b>Gene symbol</b> | <b>Clone ID</b> | <b>NM ID</b> | <b>Target sequence</b> |
|--------------------|-----------------|--------------|------------------------|
| IKK- $\alpha$      | TRCN0000244900  | NM_001278    | TAGGGTCTGGGATTCGATATT  |
| IKK- $\alpha$      | TRCN0000244901  | NM_001278    | TGAATGTATTGCTGGATATAG  |
| IKK- $\alpha$      | TRCN0000244902  | NM_001278    | ACAGCGTGCCATTGATCTATA  |
| IKK- $\alpha$      | TRCN0000244903  | NM_001278    | TGGCCATTTAAGCACTATTAT  |
| IKK- $\alpha$      | TRCN0000244904  | NM_001278    | GGTTAATGTAGTATGGTATAT  |
| IKK- $\beta$       | TRCN0000018915  | NM_001556    | GCACTGGGAAAGTATCTGAAA  |
| IKK- $\beta$       | TRCN0000018916  | NM_001556    | CCAGCCAAGAAGAGTGAAGAA  |
| IKK- $\beta$       | TRCN0000018917  | NM_001556    | GCTGGTTCATATCTTGAACAT  |
| IKK- $\beta$       | TRCN0000018918  | NM_001556    | CGGAAGTACCTGAACCAGTTT  |
| IKK- $\beta$       | TRCN0000018919  | NM_001556    | CCATGATGAATCTCCTCCGAA  |
| IKK- $\gamma$      | TRCN0000022144  | NM_003639    | CCAAGAATACGACAACCACAT  |
| IKK- $\gamma$      | TRCN0000022145  | NM_003639    | GCTCGATCTGAAGAGGCAGAA  |
| IKK- $\gamma$      | TRCN0000022146  | NM_003639    | GCAGCACAAGATTGTGATGGA  |
| IKK- $\gamma$      | TRCN0000022147  | NM_003639    | GAGAATCAAGAGCTCCGAGAT  |
| IKK- $\gamma$      | TRCN0000022148  | NM_003639    | GAGGGAGTACAGCAAACCTGAA |
| NIK                | TRCN0000230426  | NM_003954    | AGATCCTGAATGACGTGATTA  |
| NIK                | TRCN0000230427  | NM_003954    | CTCGATCAGAACTCCACAAAC  |
| NIK                | TRCN0000230428  | NM_003954    | CAAGACATCCACCGCCAAATC  |
| NIK                | TRCN0000230429  | NM_003954    | TCAGGACTCACGTAGCATTAA  |
| NIK                | TRCN0000218404  | NM_003954    | ATGGTGTGAAAGTCCAAATAC  |
| TAK1               | TRCN0000001554  | NM_145332    | GCAGTGATTCTTGGATTGTTT  |

|                 |                |           |                       |
|-----------------|----------------|-----------|-----------------------|
| TAK1            | TRCN0000001555 | NM_145332 | CCCGTGTGAACCATCCTAATA |
| TAK1            | TRCN0000001556 | NM_145332 | CAGTGTGTCTTGTGATGGAAT |
| TAK1            | TRCN0000001557 | NM_145332 | GACACACATGACCAATAACAA |
| TAK1            | TRCN0000001558 | NM_145332 | TCCTGCCACAAATGATACTAT |
| RelB            | TRCN0000014713 | NM_006509 | CATGCTTCTGAAGTGGACATA |
| RelB            | TRCN0000014714 | NM_006509 | GCTGCGGATTTGCCGAATTAA |
| RelB            | TRCN0000014715 | NM_006509 | CACAGATGAATTGGAGATCAT |
| RelB            | TRCN0000014716 | NM_006509 | AGCCCGTCTATGACAAGAAAT |
| RelB            | TRCN0000014717 | NM_006509 | CGAGAGCAAACGGCGGAAGAA |
| NFkB2(p100/p52) | TRCN0000006512 | NM_002502 | GCTGCTAAATGCTGCTCAGAA |
| NFkB2(p100/p52) | TRCN0000006513 | NM_002502 | CGATTTGATATGGCTGTGAA  |
| NFkB2(p100/p52) | TRCN0000006514 | NM_002502 | CCCTATCACAAGATGAAGATT |
| NFkB2(p100/p52) | TRCN0000006515 | NM_002502 | CCTGTAACAGTGTTTCTGCAA |
| NFkB2(p100/p52) | TRCN0000006516 | NM_002502 | GCCCAATTTAACAACCTGGGT |
